# Supplementary material for: Neoadjuvant Chemotherapy Versus Primary Debulking Surgery in FIGO Stage III and IV Epithelial Ovarian, Tubal or Peritoneal Cancer: A Systematic Review and Meta-Analysis
Source: PubMed Central journal article supplement (PMC9756845; doi:10.3389/or.2022.10605), 2022-09-27
Supplement: DataSheet2.pdf [file DataSheet2.pdf]

**Author(s):**  
**Question:** Neoadjuvant chemotherapy compared to primary debulking surgery for women with stage III and IV epithelial ovarian cancer  
**Setting:**  
**Bibliography:**

| Certainty assessment                                                   |                   |              |                          |              |                      |                      | N <sub>e</sub> of patients |                           | Effect                                                                    |                                                            | Certainty        | Importance |
|------------------------------------------------------------------------|-------------------|--------------|--------------------------|--------------|----------------------|----------------------|----------------------------|---------------------------|---------------------------------------------------------------------------|------------------------------------------------------------|------------------|------------|
| N <sub>e</sub> of studies                                              | Study design      | Risk of bias | Inconsistency            | Indirectness | Imprecision          | Other considerations | neoadjuvant chemotherapy   | primary debulking surgery | Relative (95% CI)                                                         | Absolute (95% CI)                                          |                  |            |
| <b>Overall survival (follow up: range 3 years to 6 years)</b>          |                   |              |                          |              |                      |                      |                            |                           |                                                                           |                                                            |                  |            |
| 5                                                                      | randomised trials | not serious  | not serious              | not serious  | not serious          | none                 |                            |                           | <b>HR 0.96</b><br>(0.86 to 1.07)<br>[Overall survival]                    | -- per 1,000<br>(from -- to --)                            | ⊕⊕⊕⊕<br>HIGH     | CRITICAL   |
|                                                                        |                   |              |                          |              |                      |                      | -                          | 0.0%                      |                                                                           | -- per 1,000<br>(from -- to --)                            |                  |            |
| <b>Progression-free survival (follow up: range 3 years to 6 years)</b> |                   |              |                          |              |                      |                      |                            |                           |                                                                           |                                                            |                  |            |
| 5                                                                      | randomised trials | not serious  | not serious              | not serious  | not serious          | none                 |                            |                           | <b>HR 0.98</b><br>(0.89 to 1.08)<br>[]                                    | -- per 1,000<br>(from -- to --)                            | ⊕⊕⊕⊕<br>HIGH     | IMPORTANT  |
|                                                                        |                   |              |                          |              |                      |                      | -                          | 0.0%                      |                                                                           | -- per 1,000<br>(from -- to --)                            |                  |            |
| <b>Any grade 3 or 4 adverse event</b>                                  |                   |              |                          |              |                      |                      |                            |                           |                                                                           |                                                            |                  |            |
| 3                                                                      | randomised trials | not serious  | not serious <sup>a</sup> | not serious  | serious <sup>b</sup> | none                 | 43/423 (10.2%)             | 125/486 (25.7%)           | <b>RR 0.34</b><br>(0.16 to 0.72)                                          | <b>170 fewer per 1,000</b><br>(from 216 fewer to 72 fewer) | ⊕⊕⊕⊖<br>MODERATE | CRITICAL   |
| <b>Perioperative death within 28 days</b>                              |                   |              |                          |              |                      |                      |                            |                           |                                                                           |                                                            |                  |            |
| 5                                                                      | randomised trials | not serious  | not serious              | not serious  | serious <sup>b</sup> | none                 | 3/786 (0.4%)               | 26/836 (3.1%)             | <b>RR 0.16</b><br>(0.06 to 0.46)                                          | <b>26 fewer per 1,000</b><br>(from 29 fewer to 17 fewer)   | ⊕⊕⊕⊖<br>MODERATE | CRITICAL   |
| <b>No residual disease</b>                                             |                   |              |                          |              |                      |                      |                            |                           |                                                                           |                                                            |                  |            |
| 4                                                                      | randomised trials | not serious  | serious <sup>c</sup>     | not serious  | not serious          | none                 | 370/847 (43.7%)            | 157/845 (18.6%)           | <b>RR 2.34</b><br>(1.48 to 3.71)                                          | <b>249 more per 1,000</b><br>(from 89 more to 504 more)    | ⊕⊕⊕⊖<br>MODERATE | CRITICAL   |
| <b>Optimal cytoreduction rates</b>                                     |                   |              |                          |              |                      |                      |                            |                           |                                                                           |                                                            |                  |            |
| 4                                                                      | randomised trials | not serious  | not serious <sup>e</sup> | not serious  | serious <sup>d</sup> | none                 | 565/847 (66.7%)            | 360/845 (42.6%)           | <b>RR 1.48</b><br>(0.92 to 2.38)                                          | <b>204 more per 1,000</b><br>(from 34 fewer to 588 more)   | ⊕⊕⊕⊖<br>MODERATE | IMPORTANT  |
| <b>Overall survival tumour size ≤5cm</b>                               |                   |              |                          |              |                      |                      |                            |                           |                                                                           |                                                            |                  |            |
| 3                                                                      | randomised trials | not serious  | serious <sup>c</sup>     | not serious  | serious <sup>d</sup> | none                 |                            |                           | <b>HR 1.10</b><br>(0.87 to 1.38)<br>[Overall survival tumour size ≤5cm]   | -- per 1,000<br>(from -- to --)                            | ⊕⊕⊖⊖<br>LOW      | CRITICAL   |
|                                                                        |                   |              |                          |              |                      |                      | -                          | 0.0%                      |                                                                           | -- per 1,000<br>(from -- to --)                            |                  |            |
| <b>Overall survival tumour size 5-10cm</b>                             |                   |              |                          |              |                      |                      |                            |                           |                                                                           |                                                            |                  |            |
| 2                                                                      | randomised trials | not serious  | not serious              | not serious  | serious <sup>d</sup> | none                 |                            |                           | <b>HR 0.86</b><br>(0.69 to 1.08)<br>[Overall survival tumour size 5-10cm] | -- per 1,000<br>(from -- to --)                            | ⊕⊕⊕⊖<br>MODERATE | CRITICAL   |
|                                                                        |                   |              |                          |              |                      |                      | -                          | 0.0%                      |                                                                           | -- per 1,000<br>(from -- to --)                            |                  |            |
| <b>Overall survival tumour size &gt;10cm</b>                           |                   |              |                          |              |                      |                      |                            |                           |                                                                           |                                                            |                  |            |
| 4                                                                      | randomised trials | not serious  | not serious              | not serious  | serious <sup>d</sup> | none                 |                            |                           | <b>HR 0.94</b><br>(0.78 to 1.12)<br>[Overall survival tumour size >10cm]  | -- per 1,000<br>(from -- to --)                            | ⊕⊕⊕⊖<br>MODERATE | CRITICAL   |
|                                                                        |                   |              |                          |              |                      |                      | -                          | 0.0%                      |                                                                           | -- per 1,000<br>(from -- to --)                            |                  |            |
| <b>Overall survival stage III</b>                                      |                   |              |                          |              |                      |                      |                            |                           |                                                                           |                                                            |                  |            |

|   |                   |             |             |             |                      |      |   |      |                                                                  |                                 |                  |          |
|---|-------------------|-------------|-------------|-------------|----------------------|------|---|------|------------------------------------------------------------------|---------------------------------|------------------|----------|
| 4 | randomised trials | not serious | not serious | not serious | serious <sup>d</sup> | none |   |      | <b>HR 1.00</b><br>(0.88 to 1.14)<br>[Overall survival stage III] | -- per 1,000<br>(from -- to --) | ⊕⊕⊕○<br>MODERATE | CRITICAL |
|   |                   |             |             |             |                      |      | - | 0.0% |                                                                  | -- per 1,000<br>(from -- to --) |                  |          |

**Overall survival stage IV**

|   |                   |             |             |             |                      |      |   |      |                                                                 |                                 |                  |          |
|---|-------------------|-------------|-------------|-------------|----------------------|------|---|------|-----------------------------------------------------------------|---------------------------------|------------------|----------|
| 4 | randomised trials | not serious | not serious | not serious | serious <sup>d</sup> | none |   |      | <b>HR 0.88</b><br>(0.71 to 1.09)<br>[Overall survival stage IV] | -- per 1,000<br>(from -- to --) | ⊕⊕⊕○<br>MODERATE | CRITICAL |
|   |                   |             |             |             |                      |      | - | 0.0% |                                                                 | -- per 1,000<br>(from -- to --) |                  |          |

**CI:** Confidence interval; **HR:** Hazard Ratio; **RR:** Risk ratio; **MD:** Mean difference

**Explanations**

- a. Considerable heterogeneity was observed between the included studies, however confidence intervals were consistently lower than a maximum of RR 0.87.
- b. Due to few events (<400).
- c. Considerable statistical heterogeneity.
- d. CI overlaps no effect or minimal important difference and suggests much uncertainty about the true effect.
- e. Statistical heterogeneity exists between the SCORPION trial and the rest of the included studies. However, this can be attributed to the difference of the population recruited by the SCORPION trial, as they decided to exclude patients with unresectable disease prior to randomization.
